# Supplementary material for: Characteristics of Graphene Growth at Different Temperatures from the Benzene Ring Structure in Coal Tar
Source: MDPI journal article supplement (doi:10.3390/pr11020593), 2023-02-16
Supplement: s1 [file s1]

# Supporting information

## Characteristics of graphene growth at different temperatures from the benzene ring structure in coal tar

Shuhan Zhao<sup>1</sup>, Zhongyang Luo<sup>1\*</sup>, Mengxiang Fang<sup>1</sup>, Qinhui Wang<sup>1</sup>, Jianmeng Cen<sup>1</sup>

<sup>1</sup>State Key Laboratory of Clean Energy Utilization, Zhejiang University, Zheda Road 38#, 310027, Hangzhou, China

\*Corresponding author: [zyluo@zju.edu.cn](mailto:zyluo@zju.edu.cn)

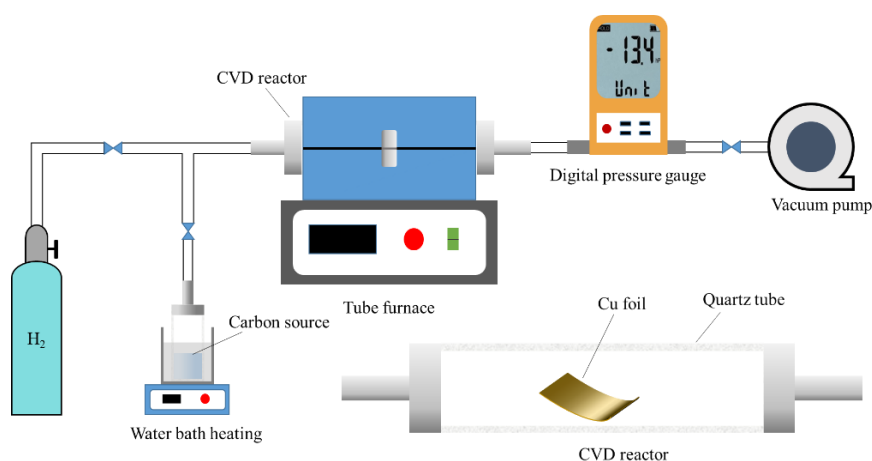

**Figure S1:** Experimental equipment

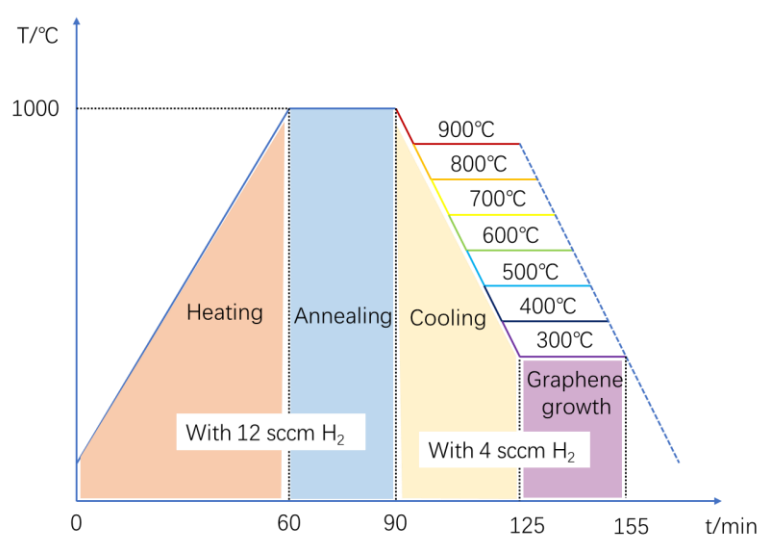

**Figure S2:** Details of graphene low-temperature growth experiments

300°C

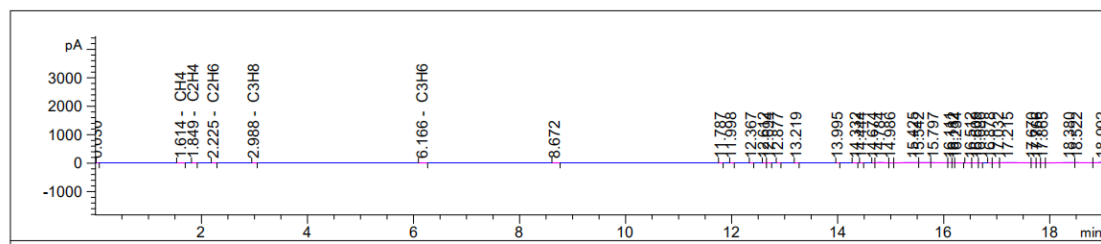

400°C

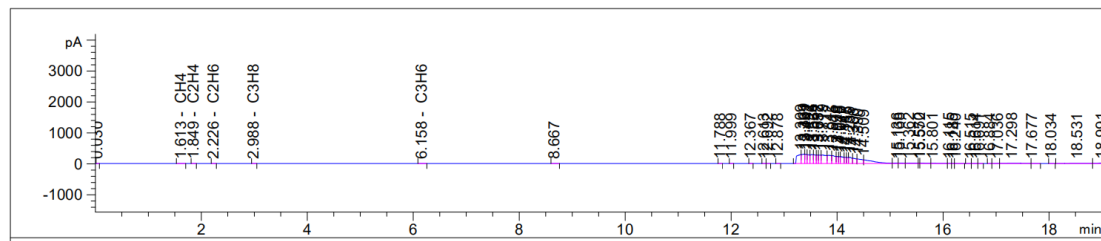

500°C

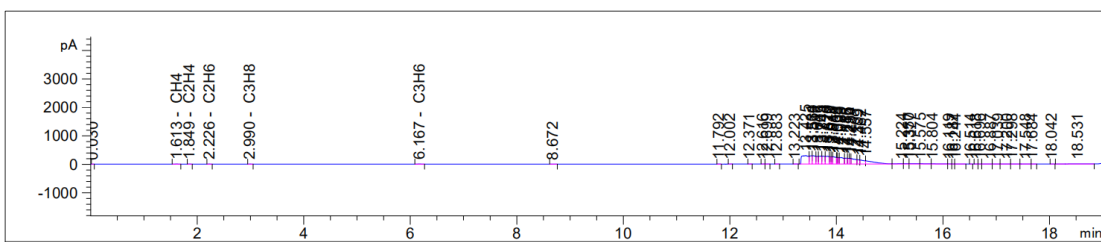

600°C

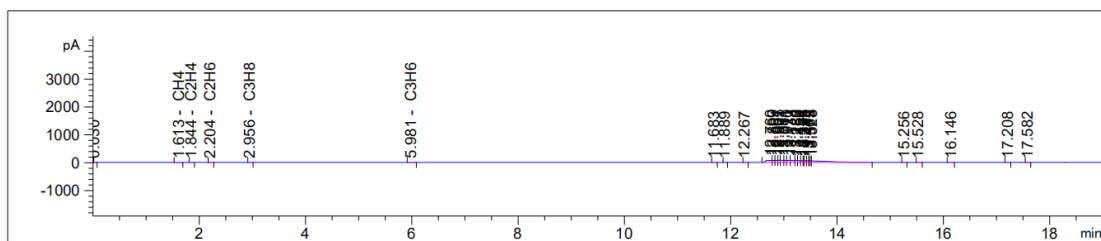

700°C

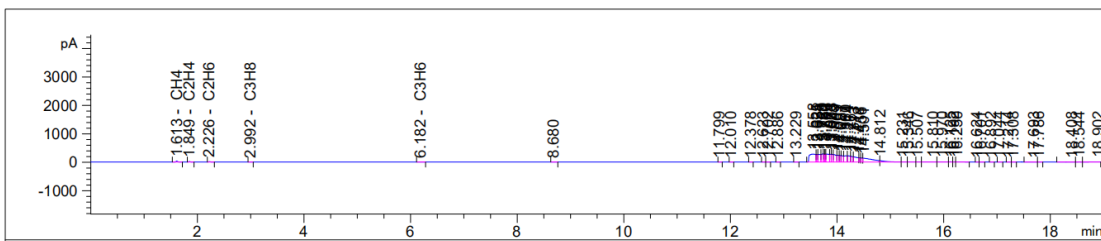

800°C

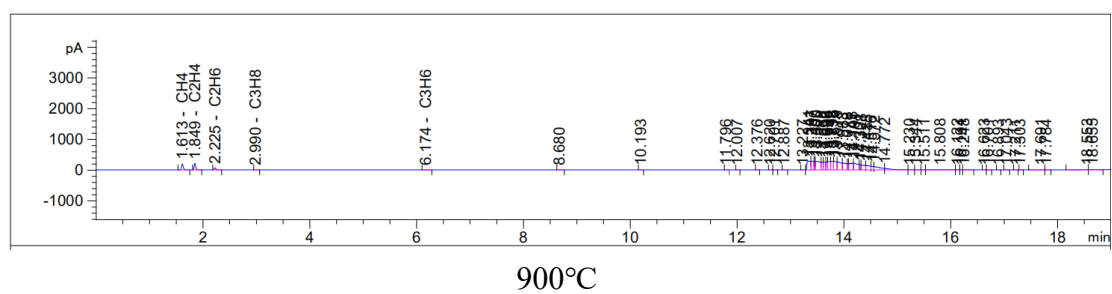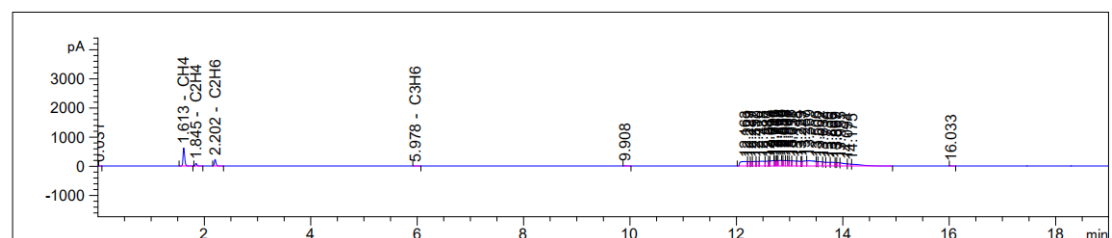

**Figure S3:** Gas chromatogram examples of benzene ring chemical vapor deposition on copper foil at different temperatures (300~900°C)
