# Supplementary material for: Characteristics of Graphene Growth at Different Temperatures from the Benzene Ring Structure in Coal Tar
Source: MDPI journal article supplement (doi:10.3390/pr11020593), 2023-02-16
Supplement: s1 [file s1]

Archive with 3 entries (3 files):
- Supplementary Information.pdf
- table S1-coal tar components.xlsx
- Video S1-Schematic animation of the low-temperature direct growth of graphene from benzene rings.mp4
