# Supplementary material for: Characteristics of Graphene Growth at Different Temperatures from the Benzene Ring Structure in Coal Tar
Source: MDPI journal article supplement (doi:10.3390/pr11020593), 2023-02-16
Supplement: s1 [file s1 › table S1-coal tar components.xlsx]

## Sheet: Sheet1
Table S1: The type of coal tar composition compounds from Chinese Shanxi Gemeng coal through pyrolysis in a 1MW double circulating-fluidized-bed (CFB) experimental platform
Library/ID	CAS	category	content/%
1-Naphthalenol, 5,8-dihydro-	027673-48-9	phenols	2.52
2-Hydroxyfluorene	002443-58-5
Phenol, 3-(2-phenylethenyl)-, (E)-	017861-18-6
o-(p-(Dimethylamino)benzylideneamino)phenol	023837-35-6
3-[(2-Methyl-5-nitro-phenylimino)-methyl]-phenol	1000297-24-5
4-Chloro-N-(3,5-dibromo-4-hydroxyphenyl)benzenesulfonamide	146463-23-2
Tetradecane	000629-59-4	chain hydrocarbons	0.32
Heptadecane	000629-78-7
Bicyclo[7.7.0]hexadec-1(9)-ene	1000159-39-6	cyclic hydrocarbons	0.57
Benzene, 1-ethyl-3-methyl-	000620-14-4	monocyclic aromatic hydrocarbons	13.51
Benzene, 1,2,3-trimethyl-	000526-73-8
Indane	000496-11-7
Indene	000095-13-6
Benzene, 4-ethyl-1,2-dimethyl-	000934-80-5
Benzene, 1,2,3,4-tetramethyl-	000488-23-3
Benzene, 1-ethyl-2,4-dimethyl-	000874-41-9
Benzene, 1-methyl-4-(2-propenyl)-	003333-13-9
Benzene, 2-ethenyl-1,3-dimethyl-	002039-90-9
Benzene, 1,2,4,5-tetramethyl-	000095-93-2
Benzene, 1,2,4,5-tetramethyl-	000095-93-2
Benzene, 4-ethenyl-1,2-dimethyl-	027831-13-6
Benzene, 2-ethenyl-1,4-dimethyl-	002039-89-6
Benzene, 1,3-diethyl-5-methyl-	002050-24-0
1H-Indene, 2,3-dihydro-5-methyl-	000874-35-1
2-Methylindene	002177-47-1
Benzene, 1-butynyl-	000622-76-4
1,4-Dihydronaphthalene	000612-17-9
1H-Indene, 1,1-dimethyl-	018636-55-0
1H-Cyclopropa[b]naphthalene, 1a,2,7,7a-tetrahydro-	006571-72-8
Benzene, 2-ethenyl-1,3,5-trimethyl-	000769-25-5
2-Ethyl-2,3-dihydro-1H-indene	056147-63-8
1H-Indene, 1-ethenyl-2,3-dihydro-	051783-46-1
1H-Indene, 1,1-dimethyl-	018636-55-0
1H-Indene, 2,3-dihydro-4,7-dimethyl-	006682-71-9
1H-Indene, 2,3-dimethyl-	004773-82-4
1H-Indene, 1,3-dimethyl-	002177-48-2
Naphthalene, 1,2-dihydro-6-methyl-	002717-47-7
Benzene, 1-cyclopenten-1-yl-	000825-54-7
Naphthalene, 1,2-dihydro-3-methyl-	002717-44-4
1H-Cyclopropa[b]naphthalene, 1a,2,7,7a-tetrahydro-	006571-72-8
Naphthalene, 1,2-dihydro-6-methyl-	002717-47-7
1H-Indene, 1-ethylidene-	002471-83-2
(1-Methylpenta-2,4-dienyl)benzene	1000210-01-1
(1-Methylpenta-2,4-dienyl)benzene	1000210-01-1
(1-Methylpenta-2,4-dienyl)benzene	1000210-01-1
Naphthalene, 1,2,3,4-tetrahydro-1,5,8-trimethyl-	021693-51-6
Benzene, 1,4-bis(1-methylethenyl)-	001605-18-1
1,2,3-Trimethylindene	004773-83-5
1H-Indene, 1,1,3-trimethyl-	002177-45-9
Naphthalene, 1,2,3,4-tetrahydro-1,5,8-trimethyl-	021693-51-6
Naphthalene, 1,4-dihydro-2,5,8-trimethyl-	030316-19-9
1,4-Methanonaphthalene,1,4-dihydro-9-((1-methylethylidene)-	007350-72-3
Azulene, 7-ethyl-1,4-dimethyl-	000529-05-5
Azulene, 7-ethyl-1,4-dimethyl-	000529-05-5
Naphthalene	000091-20-3	polycyclic aromatic hydrocarbons	71.72
Naphthalene, 2-methyl-	000091-57-6
Naphthalene, 2-methyl-	000091-57-6
Biphenyl	000092-52-4
Naphthalene, 1-ethyl-	001127-76-0
Naphthalene, 2,7-dimethyl-	000582-16-1
Naphthalene, 1,7-dimethyl-	000575-37-1
Naphthalene, 2,7-dimethyl-	000582-16-1
Biphenyl	000092-52-4
Naphthalene, 2,3-dimethyl-	000581-40-8
Biphenylene	000259-79-0
1,1'-Biphenyl, 3-methyl-	000643-93-6
Acenaphthene	000083-32-9
1,1'-Biphenyl, 3-methyl-	000643-93-6
Naphthalene, 1,4,6-trimethyl-	002131-42-2
Naphthalene, 2,3,6-trimethyl-	000829-26-5
Naphthalene, 2,3,6-trimethyl-	000829-26-5
Naphthalene, 2,3,6-trimethyl-	000829-26-5
Naphthalene, 1,4,6-trimethyl-	002131-42-2
Naphthalene, 2,3,6-trimethyl-	000829-26-5
Naphthalene, 2,3,6-trimethyl-	000829-26-5
Naphthalene, 2,3,6-trimethyl-	000829-26-5
Fluorene	000086-73-7
1-Isopropenylnaphthalene	001855-47-6
Naphthalene, 1,4,5-trimethyl-	002131-41-1
Fluorene	000086-73-7
Fluorene	000086-73-7
3,3'-Dimethylbiphenyl	000612-75-9
Naphthalene, 1,2,3,4-tetramethyl-	003031-15-0
Naphthalene, 1,2,3,4-tetramethyl-	003031-15-0
3H-Benz[e]indene, 2-methyl-	150096-60-9
9H-Fluorene, 2-methyl-	001430-97-3
9H-Fluorene, 2-methyl-	001430-97-3
1,4,5,8-Tetramethylnaphthalene	002717-39-7
9H-Fluorene, 2-methyl-	001430-97-3
1,1'-Biphenyl, 3,4'-dimethyl-	007383-90-6
9H-Fluorene, 2-methyl-	001430-97-3
Benzene, 1,1'-methylenebis[2-methyl-	001634-74-8
1,3,5-Cycloheptatriene, 6-methyl-1-(6-methyl-1,3,5-cycloheptatrien-1-yl)-	1000154-68-1
1,1'-Biphenyl, 3-(1-methylethyl)-	020282-30-8
Anthracene	000120-12-7
Anthracene	000120-12-7
9H-Fluorene, 2,3-dimethyl-	004612-63-9
9H-Fluorene, 2,3-dimethyl-	004612-63-9
9H-Fluorene, 2,3-dimethyl-	004612-63-9
Phenanthrene, 9,10-dihydro-1-methyl-	095676-48-5
Phenanthrene, 9,10-dihydro-1-methyl-	095676-48-5
9H-Fluorene, 2,3-dimethyl-	004612-63-9
1,1'-Biphenyl, 3,3',4,4'-tetramethyl-	004920-95-0
1,1'-Biphenyl, 3,3',4,4'-tetramethyl-	004920-95-0
9H-Fluorene, 2,3-dimethyl-	004612-63-9
1,1'-Biphenyl, 2,2',5,5'-tetramethyl-	003075-84-1
Phenanthrene, 2-methyl-	002531-84-2
Phenanthrene, 2-methyl-	002531-84-2
Anthracene, 1-methyl-	000610-48-0
1H-Cyclopropa[l]phenanthrene,1a,9b-dihydro-	000949-41-7
Phenanthrene, 1-methyl-	000832-69-9
1,2,5,6-Tetramethylacenaphthylene	132118-73-1
Phenanthrene, 4-methyl-	000832-64-4
2-Phenylnaphthalene	035465-71-5
Anthracene, 2-ethyl-	052251-71-5
Phenanthrene, 3,6-dimethyl-	001576-67-6
Phenanthrene, 3,6-dimethyl-	001576-67-6
di-p-Tolylacetylene	002789-88-0
Phenanthrene, 2,5-dimethyl-	003674-66-6
Phenanthrene, 3,6-dimethyl-	001576-67-6
Phenanthrene, 1,7-dimethyl-	000483-87-4
Phenanthrene, 1,7-dimethyl-	000483-87-4
Fluoranthene	000206-44-0
Phenanthrene, 3,6-dimethyl-	001576-67-6
Anthracene, 9-(2-propenyl)-	023707-65-5
Anthracene, 9-(2-propenyl)-	023707-65-5
Fluoranthene	000206-44-0
Pyrene	000129-00-0
Naphthalene, 1,8-di-1-propynyl-	022360-77-6
1-(4-Methylphenyl)-4-phenylbuta-1,3-diene	037985-11-8
Phenanthrene, 2,3,5-trimethyl-	003674-73-5
Phenanthrene, 2,3,5-trimethyl-	003674-73-5
Pyrene, 1-methyl-	002381-21-7
Azulene, 4,8-dimethyl-6-phenyl-	042758-88-3
Pyrene, 1-methyl-	002381-21-7
11H-Benzo[b]fluorene	000243-17-4
Pyrene, 2-methyl-	003442-78-2
Pyrene, 4-methyl-	003353-12-6
1,2,3,4-Tetrahydrochrysene	002091-90-9
Pyrene, 1-methyl-	002381-21-7
Pyrene, 1-methyl-	002381-21-7
1,2,3,4-Tetrahydrobenz[a]anthracene	004483-98-1
8,9,10,11-Tetrahydrobenz[a]anthracene	067064-62-4
Pyrene, 1,3-dimethyl-	064401-21-4
Pyrene, 1,3-dimethyl-	064401-21-4
Pyrene, 1,3-dimethyl-	064401-21-4
Pyrene, 1,3-dimethyl-	064401-21-4
Pyrene, 1,3-dimethyl-	064401-21-4
Pyrene, 1,3-dimethyl-	064401-21-4
o-Terphenyl	000084-15-1
Pyrene, 1,3-dimethyl-	064401-21-4
Benzo[a]anthracene, 6,12-dimethyl-1,2,3,4-tetrahydro-	063020-35-9
Triphenylene	000217-59-4
Triphenylene	000217-59-4
Triphenylene	000217-59-4
Naphthalene, 2-(1-methyl-2-phenylethenyl)-	017181-02-1
Naphthalene, 2-(1-methyl-2-phenylethenyl)-	017181-02-1
Benz[a]anthracene, 1-methyl-	002498-77-3
Chrysene, 1-methyl-	003351-28-8
Chrysene, 6-methyl-	001705-85-7
4,5,11,12-Tetrahydrobenzo[a]pyrene	109292-58-2
Benzo[c]phenanthrene, 5,8-dimethyl-	054986-63-9
Benz[e]acephenanthrylene	000205-99-2
Benzo[a]pyrene	000050-32-8
Benzo[e]pyrene	000192-97-2
Benz[e]acephenanthrylene	000205-99-2
8H-Indeno[2,1-b]phenanthrene	000241-28-1
Benz[j]aceanthrylene, 3-methyl-	003343-10-0
2-Propenal, 3-phenyl-	000104-55-2	other oxygenated compounds	8.12
Benzofuran, 2-methyl-	004265-25-2
Benzofuran, 4,7-dimethyl-	028715-26-6
Ethanone, 1-[4-(1-methylethenyl)phenyl]-	005359-04-6
Ethanone, 1-[4-(1-methylethenyl)phenyl]-	005359-04-6
Benzofuran, 5-chloro-2,3-dihydro-2-methyl-	054410-96-7
Fluorene-9-methanol	024324-17-2
Fluorene-9-methanol	024324-17-2
1-Acenaphthylenol, 1,2-dihydro-1-methyl-	041002-74-8
Dibenzofuran, 4-methyl-	007320-53-8
[1,1'-Biphenyl]-4-carboxaldehyde	003218-36-8
9H-Fluoren-9-ol	001689-64-1
9-Methoxyfluorene	019126-15-9
9-Methoxyfluorene	019126-15-9
5H-Dibenzo(a,d)cyclohepten-5-ol	010354-00-4
N-(4-Methoxyphenyl)-2-hydroxyimino-acetamide	1000143-61-3
Biphenyl-4-carboxylic acid	000092-92-2
Pyrene, 1-(methoxymethyl)-	091385-15-8
1H-Inden-1-one, 2-(2,3-dihydro-1H-inden-1-ylidene)-2,3-dihydro-	005706-06-9
1-Phenyldibenzofuran	1000314-39-4
Dimethyl 2,3-di(2-methyl-1-propenyl)-2,5-cyclohexadiene-1,4-dicarboxylate	156298-41-8
1H-Benzimidazole, 5,6-dimethyl-	000582-60-5	nitrogen-containing compounds	1.68
1H-Benzimidazole, 5,6-dimethyl-	000582-60-5
2,5,6-Trimethylbenzimidazole	003363-56-2
5,6-Dimethyl-1,10-phenanthroline	003002-81-1
5,6-Dimethyl-1,10-phenanthroline	003002-81-1
Benz[c]acridine	000225-51-4
1-Pyrenecarboxaldehyde hydrazone	076465-53-7
2-Pyridineacetonitrile, .alpha.-(4-methoxyphenyl)-	038236-51-0	oxygen and nitrogen compounds	0.69
1H-Indole-3-carboxaldehyde, 5-methyl-2-phenyl-	041019-13-0
1-Benzothieno[3,2-f]quinazoline-1,3-diamine	065642-92-4	nitrogenous sulfur compounds	0.19
Nickel, (.eta.5-2,4-cyclopentadien-1-yl)[(1,2,3-.eta.)-4,4-dimethyl-2-cyclopenten-1-yl]-	079704-72-6	metal-containing compounds	0.69
Ferrocene, (trimethylsilyl)-	012215-68-8
